# Supplementary material
Source: PubMed Central journal article supplement (PMC2479615)
Supplement: 108.132324_1.pdf [file 108.132324_1.pdf]

**Supplement to**  
**Flow Induced Structural Transition in the  $\beta$ -switch Region of**  
**Glycoprotein Ib**

Zhongzhou Chen<sup>1</sup>, Jizhong Lou<sup>2</sup>, Cheng Zhu<sup>2,3,4\*</sup> and Klaus Schulten<sup>1,\*</sup>

<sup>1</sup>*Theoretical and Computational Biophysics Group, Beckman Institute,*

*University of Illinois at Urbana-Champaign, 405 N. Mathews, Urbana, IL 61801, USA.*

<sup>2</sup>*Institute for Bioengineering and Bioscience, <sup>2</sup>Coulter School of Biomedical Engineering, and*

<sup>3</sup>*Woodruff School of Mechanical Engineering ,*

*Georgia Institute of Technology, Atlanta, GA 30332, USA*

\*Corresponding authors; e-mail:cheng.zhu@bme.gatech.edu, kschulte@ks.uiuc.edu

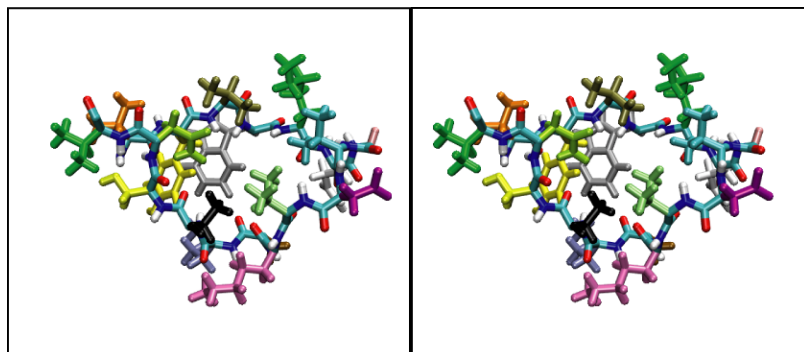

WT1

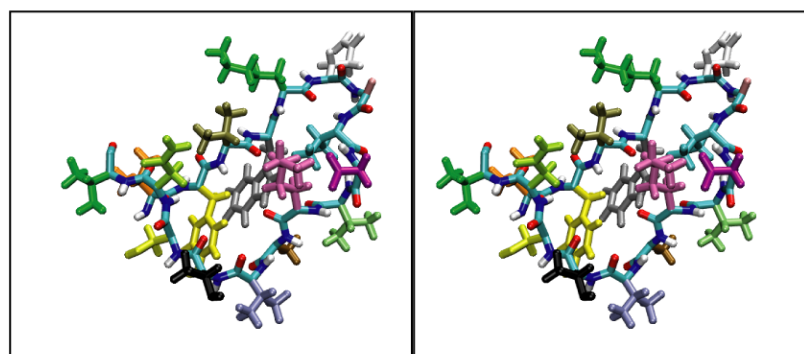

GOF1

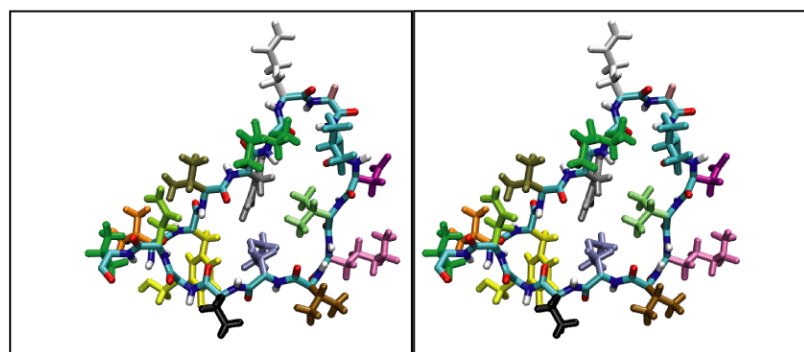

LOF1

Figure 1: : Stereo views of the initial structure of simulation sets:  $F_{GOF1}$ ,  $F_{WT1}$ ,  $F_{LOF1}$ . (see Table 2)

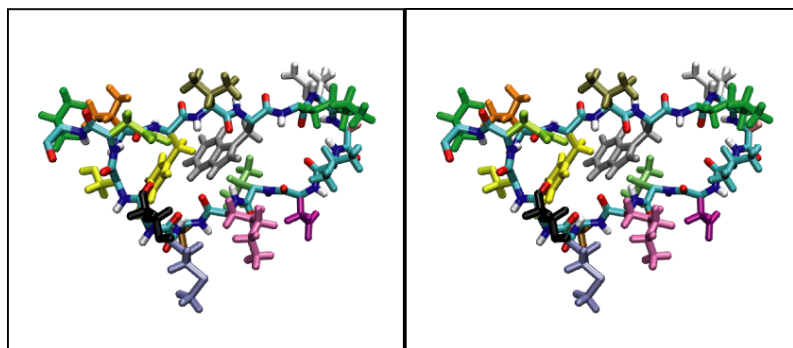

WT2

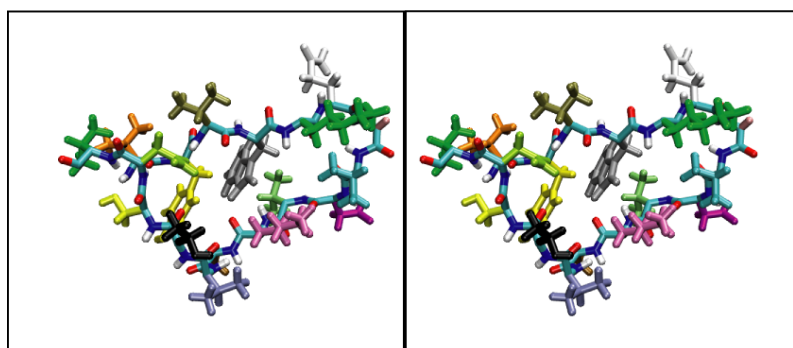

GOF2

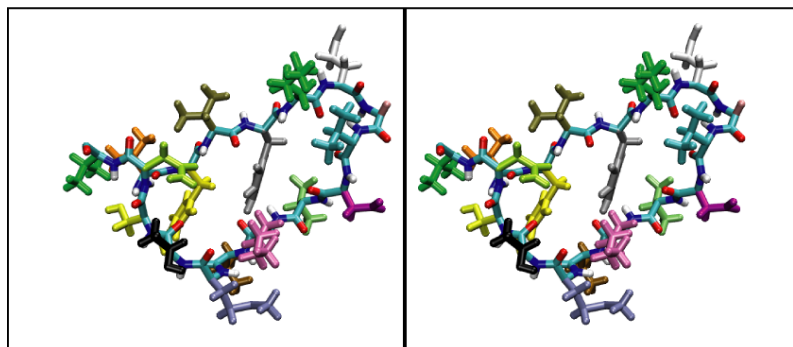

LOF2

Figure 2: : Stereo views of the initial structure of simulation sets:  $F_{GOF2}$ ,  $F_{WT2}$ ,  $F_{LOF2}$ . (see Table 2)
